# Supplementary material for: Dehydration induced transcriptomic responses in two Tibetan hulless barley (Hordeum vulgare var. nudum) accessions distinguished by drought tolerance
Source: BMC Genomics. 2017 Oct 11;18:775. doi: 10.1186/s12864-017-4152-1 (PMC5637072; doi:10.1186/s12864-017-4152-1)
Supplement: Supplementary file 2 — The expression pattern of five housekeeping genes. (GAPDH, EF1α, β-Actin, β-Tubulin and UBQ). (XLSX 11 kb) [file 12864_2017_4152_MOESM2_ESM.xlsx]

## Sheet: Sheet1
The expression pattern of five housekeeping genes (GAPDH, EF1α, β-Actin, β-Tubulin and UBQ)
Gene ID	A_RPKM	B_RPKM	C_RPKM	D_RPKM	E_RPKM	F_RPKM
GAPDH (HVU000460.1)	156.54	360.04	745.1	336.2	333.63	757.51
EF1α (HVU005516.1)	72.04	77.81	100.4	64	90.87	82.37
β-Actin (HVU017956.1)	991.39	1193.67	384.18	1129.98	1074.5	669.15
β-Tubulin (HVU022935.1)	188.33	159.49	288.05	88.63	96.47	218.24
UBQ (HVU035174.1)	135.96	90.95	154.47	127.19	124.54	182.38
The expression levels of these genes were presented as their RPKM value.
